# Supplementary material for: Transcriptomic analysis reveals niche gene expression effects of beta-hydroxybutyrate in primary myotubes
Source: bioRxiv or medRxiv preprint supplement (doi:10.1101/2021.01.19.427259), 2021-01-20
Supplement: Supplementary file [file media-1.pdf]

# Supplemental figure 1

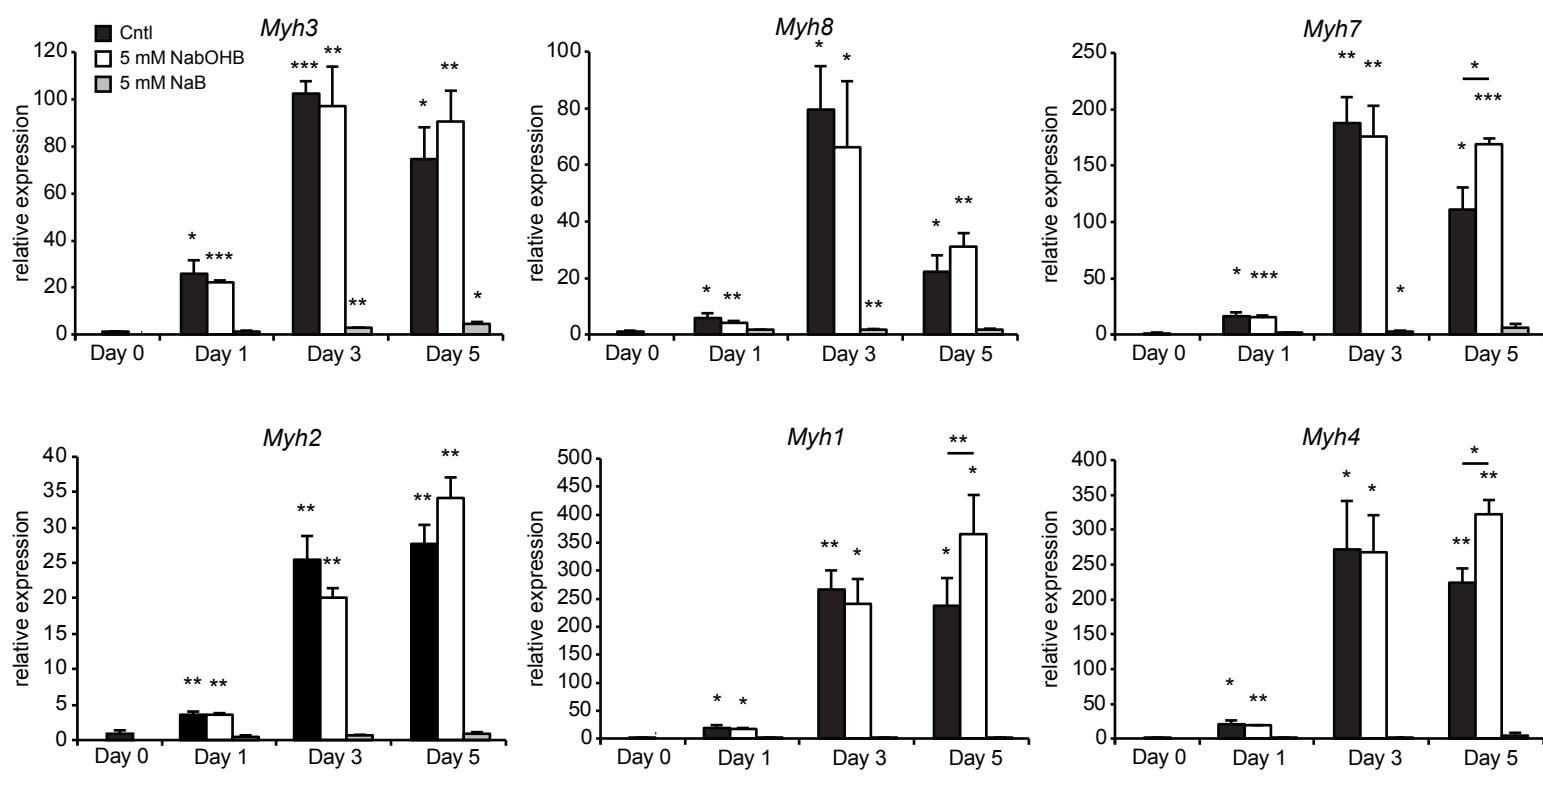

Supplemental figure 1: Gene expression of myotube polarization markers for type I and type II muscle fibers. Error bars represent SD. Asterisks indicate significant differences according to Student's t test (\* p < 0.05; \*\* p < 0.01; \*\*\* p < 0.001).
