# Supplementary material for: Transcriptomic analysis reveals niche gene expression effects of beta-hydroxybutyrate in primary myotubes
Source: bioRxiv or medRxiv preprint supplement (doi:10.1101/2021.01.19.427259), 2021-01-20
Supplement: Supplementary file [file media-2.pdf]

# Supplemental figure 2

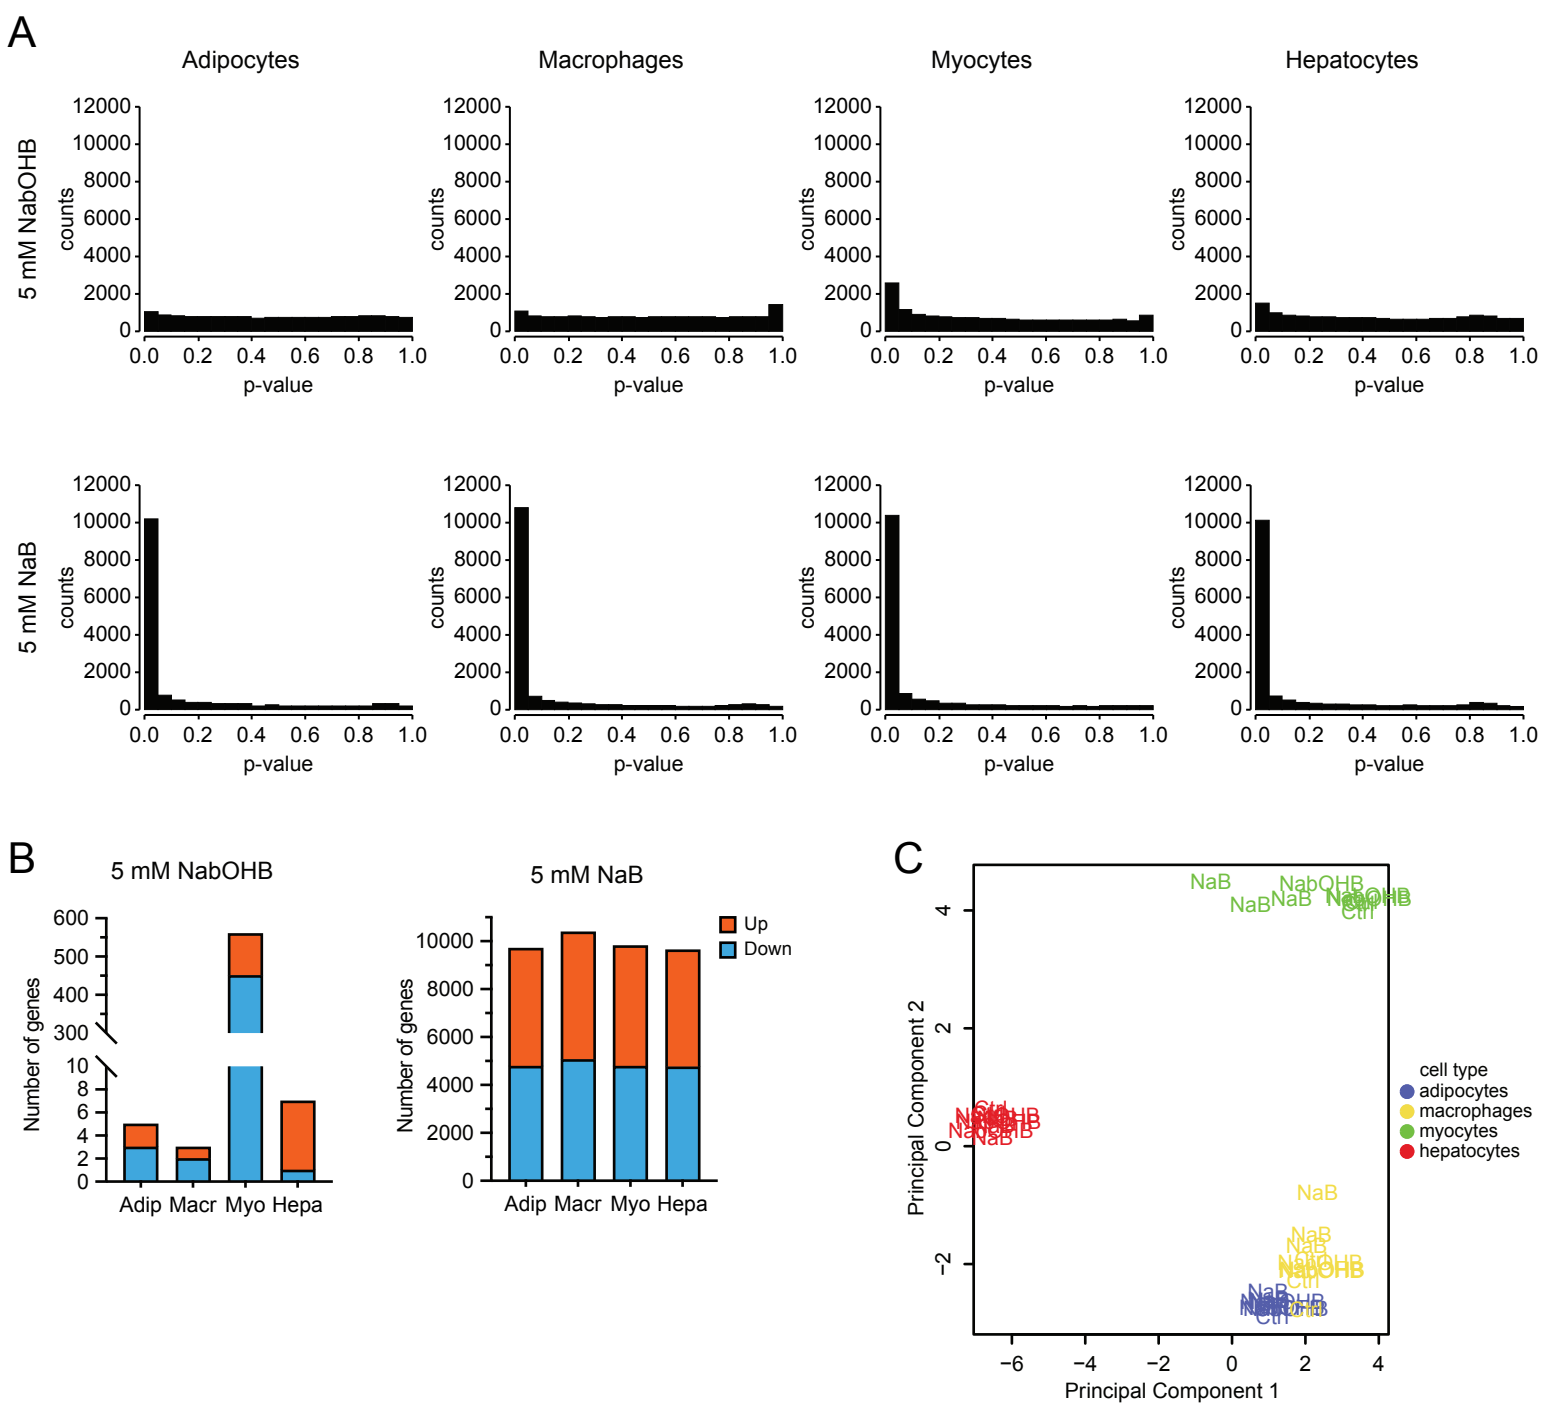

Supplemental figure 2: (A) Expression levels (log2CPM) of monocarboxylate transporters Mct1, Mct2 and Mct7 in relation to Gapdh and Bdh1. (B) Raw p-value histograms for butyrate and  $\beta$ OHB treated cell types. (C) Number of genes significantly altered by treatment with  $\beta$ OHB and butyrate (FDR  $q < 0.05$ ). (D) Principle component analysis of  $\beta$ OHB and butyrate treated samples.
