# Supplementary material for: Transcriptomic analysis reveals niche gene expression effects of beta-hydroxybutyrate in primary myotubes
Source: bioRxiv or medRxiv preprint supplement (doi:10.1101/2021.01.19.427259), 2021-01-20
Supplement: Supplementary file [file media-3.pdf]

**Supplemental table 1: FDR p<0.001 genes regulated by NabOHB treatment in primary myocytes.**

| Gene name            | log2FC | FDR.BH   | Gene name            | log2FC | FDR.BH   | Gene name         | log2FC | FDR.BH   |
|----------------------|--------|----------|----------------------|--------|----------|-------------------|--------|----------|
| <i>Gm43590</i>       | -4,46  | 3,8E- 03 | <i>A630001G21Rik</i> | -2,48  | 4,1E- 03 | <i>Selplg</i>     | -2,13  | 1,6E- 02 |
| <i>Gm48113</i>       | -4,21  | 2,2E- 02 | <i>Gpr171</i>        | -2,47  | 2,1E- 02 | <i>Lyl1</i>       | -2,12  | 3,7E- 02 |
| <i>Clec4a1</i>       | -4,09  | 1,9E- 04 | <i>Gm5431</i>        | -2,46  | 8,0E- 03 | <i>Tlr13</i>      | -2,11  | 1,0E- 03 |
| <i>Gm49339</i>       | -3,93  | 2,2E- 02 | <i>A130077B15Rik</i> | -2,43  | 6,8E- 03 | <i>Arhgap9</i>    | -2,10  | 7,5E- 04 |
| <i>Gm10645</i>       | -3,68  | 2,2E- 02 | <i>Psmb8</i>         | -2,43  | 1,6E- 02 | <i>Grap2</i>      | -2,10  | 2,2E- 02 |
| <i>Bcl2a1d</i>       | -3,52  | 7,6E- 04 | <i>Themis2</i>       | -2,41  | 9,1E- 03 | <i>Pik3cg</i>     | -2,10  | 6,8E- 03 |
| <i>Tifab</i>         | -3,47  | 2,9E- 04 | <i>Clec7a</i>        | -2,40  | 2,1E- 03 | <i>Cd200r2</i>    | -2,10  | 2,2E- 02 |
| <i>Cd300ld</i>       | -3,45  | 5,0E- 04 | <i>Gna15</i>         | -2,37  | 4,4E- 02 | <i>Slc15a3</i>    | -2,09  | 1,6E- 02 |
| <i>Apoc2</i>         | -3,45  | 2,1E- 02 | <i>Naip6</i>         | -2,36  | 7,3E- 03 | <i>C1qc</i>       | -2,08  | 5,7E- 04 |
| <i>AW112010</i>      | -3,32  | 1,1E- 02 | <i>Fcgr2b</i>        | -2,36  | 1,8E- 03 | <i>She</i>        | -2,07  | 3,7E- 02 |
| <i>Gm29100</i>       | -3,24  | 7,5E- 04 | <i>Srgn</i>          | -2,34  | 4,6E- 04 | <i>Tyrobp</i>     | -2,06  | 7,5E- 04 |
| <i>Ggt5</i>          | -3,08  | 8,9E- 03 | <i>Itgax</i>         | -2,34  | 1,6E- 03 | <i>Il7r</i>       | -2,06  | 2,3E- 02 |
| <i>Osm</i>           | -3,06  | 1,7E- 03 | <i>Fcgr4</i>         | -2,33  | 5,6E- 03 | <i>Rps2 -ps13</i> | -2,05  | 1,6E- 02 |
| <i>Pf4</i>           | -3,05  | 1,5E- 03 | <i>Ms4a4a</i>        | -2,33  | 5,7E- 03 | <i>Cybb</i>       | -2,01  | 2,6E- 03 |
| <i>Gm21188</i>       | -3,03  | 1,3E- 03 | <i>H2-Ab1</i>        | -2,33  | 3,2E- 02 | <i>Fermt3</i>     | -2,01  | 5,7E- 04 |
| <i>B430306N03Rik</i> | -2,99  | 5,6E- 03 | <i>Slamf8</i>        | -2,33  | 3,7E- 02 | <i>Dock2</i>      | -2,01  | 1,4E- 03 |
| <i>Mfng</i>          | -2,94  | 1,4E- 03 | <i>Cx3cr1</i>        | -2,31  | 8,9E- 04 | <i>Ccr1</i>       | -2,00  | 7,2E- 04 |
| <i>Prdm1</i>         | -2,88  | 3,0E- 03 | <i>Gm11992</i>       | -2,31  | 7,3E- 03 | <i>Vav1</i>       | -2,00  | 1,6E- 03 |
| <i>Lrrc25</i>        | -2,87  | 8,4E- 04 | <i>Lst1</i>          | -2,30  | 1,4E- 02 | <i>Ms4a6d</i>     | -1,99  | 9,8E- 04 |
| <i>Tnfsf8</i>        | -2,86  | 1,1E- 02 | <i>Sncaip</i>        | -2,28  | 8,9E- 03 | <i>Nlrp1b</i>     | -1,99  | 3,3E- 03 |
| <i>Gpr34</i>         | -2,86  | 2,0E- 03 | <i>2210406H18Rik</i> | -2,27  | 1,1E- 02 | <i>Ptprc</i>      | -1,97  | 4,6E- 03 |
| <i>Cd86</i>          | -2,83  | 8,8E- 03 | <i>Clec4n</i>        | -2,27  | 3,8E- 03 | <i>C1qb</i>       | -1,97  | 6,3E- 04 |
| <i>Acod1</i>         | -2,82  | 2,5E- 02 | <i>Csf2rb</i>        | -2,25  | 1,4E- 02 | <i>Fcrl1</i>      | -1,95  | 4,3E- 02 |
| <i>Tnfsf13</i>       | -2,82  | 9,0E- 03 | <i>Tlr9</i>          | -2,25  | 2,6E- 02 | <i>Stap1</i>      | -1,95  | 4,0E- 02 |
| <i>H2-Aa</i>         | -2,81  | 8,3E- 03 | <i>Icam2</i>         | -2,24  | 3,7E- 02 | <i>Tnf</i>        | -1,95  | 1,0E- 02 |
| <i>3930402G23Rik</i> | -2,76  | 3,1E- 02 | <i>Apobec1</i>       | -2,24  | 2,2E- 04 | <i>Foxj1</i>      | -1,94  | 3,3E- 02 |
| <i>Rab19</i>         | -2,76  | 2,4E- 02 | <i>Batf</i>          | -2,24  | 2,9E- 02 | <i>Grk3</i>       | -1,93  | 5,0E- 03 |
| <i>Aoah</i>          | -2,75  | 1,6E- 03 | <i>Tnfrsf11a</i>     | -2,24  | 1,7E- 03 | <i>Napsa</i>      | -1,92  | 2,2E- 02 |
| <i>Mcoln2</i>        | -2,74  | 4,5E- 03 | <i>4933430117Rik</i> | -2,23  | 2,3E- 02 | <i>Cd52</i>       | -1,92  | 2,1E- 03 |
| <i>Card9</i>         | -2,74  | 6,1E- 03 | <i>Ms4a14</i>        | -2,23  | 2,0E- 03 | <i>Irf8</i>       | -1,90  | 1,4E- 03 |
| <i>Apol7c</i>        | -2,70  | 4,4E- 03 | <i>C5ar1</i>         | -2,22  | 1,7E- 03 | <i>Cd33</i>       | -1,90  | 3,8E- 03 |
| <i>H2-Eb1</i>        | -2,67  | 4,6E- 04 | <i>Spi1</i>          | -2,21  | 8,8E- 03 | <i>Slc11a1</i>    | -1,90  | 1,4E- 02 |
| <i>P2ry13</i>        | -2,64  | 2,7E- 03 | <i>C1qa</i>          | -2,21  | 1,8E- 03 | <i>Gm37168</i>    | -1,90  | 2,1E- 02 |
| <i>Siglece</i>       | -2,62  | 3,4E- 02 | <i>Drd1</i>          | -2,21  | 1,3E- 02 | <i>Il10ra</i>     | -1,89  | 4,9E- 02 |
| <i>Slfn5</i>         | -2,61  | 2,7E- 02 | <i>Clec4a3</i>       | -2,21  | 1,6E- 02 | <i>Gpr65</i>      | -1,89  | 2,5E- 02 |
| <i>Cd74</i>          | -2,60  | 1,5E- 02 | <i>Cnr2</i>          | -2,20  | 1,3E- 02 | <i>Bcl2a1b</i>    | -1,89  | 1,9E- 03 |
| <i>Kcnj10</i>        | -2,59  | 4,6E- 04 | <i>Fgd2</i>          | -2,19  | 7,3E- 03 | <i>Lair1</i>      | -1,88  | 2,5E- 02 |
| <i>Clec10a</i>       | -2,57  | 2,6E- 02 | <i>Fcrls</i>         | -2,19  | 9,9E- 04 | <i>Ebi3</i>       | -1,88  | 3,6E- 02 |
| <i>Abcg3</i>         | -2,54  | 5,0E- 04 | <i>Ms4a6c</i>        | -2,18  | 4,6E- 04 | <i>Runx3</i>      | -1,88  | 8,1E- 03 |
| <i>Ccr2</i>          | -2,54  | 8,8E- 03 | <i>B3gnt7</i>        | -2,15  | 7,6E- 03 | <i>Tall</i>       | -1,88  | 4,1E- 02 |
| <i>P2ry12</i>        | -2,51  | 3,4E- 03 | <i>Cd244a</i>        | -2,15  | 4,0E- 02 | <i>Csflr</i>      | -1,88  | 1,3E- 03 |
| <i>Gmfg</i>          | -2,51  | 1,7E- 03 | <i>Btk</i>           | -2,15  | 6,0E- 04 | <i>Hcls1</i>      | -1,87  | 2,2E- 03 |
| <i>Ptpro</i>         | -2,51  | 2,5E- 02 | <i>Siglec1</i>       | -2,14  | 3,5E- 02 | <i>Cd300c2</i>    | -1,87  | 1,1E- 02 |
| <i>Inpp5d</i>        | -2,50  | 2,8E- 02 | <i>Plcb2</i>         | -2,14  | 2,1E- 02 | <i>Csf2rb2</i>    | -1,86  | 1,0E- 02 |
| <i>Tpbgl</i>         | -2,50  | 8,9E- 04 | <i>Cysltr1</i>       | -2,13  | 1,7E- 03 | <i>Lpxn</i>       | -1,86  | 4,5E- 03 |

| Gene name            | log2FC | FDR.BH  | Gene name       | log2FC | FDR.BH  | Gene name        | log2FC | FDR.BH  |
|----------------------|--------|---------|-----------------|--------|---------|------------------|--------|---------|
| <i>Igsf6</i>         | -1,86  | 1,7E-03 | <i>Cd68</i>     | -1,69  | 2,5E-03 | <i>Lyz2</i>      | -1,52  | 9,8E-04 |
| <i>Stra6l</i>        | -1,86  | 4,8E-02 | <i>Lilr4b</i>   | -1,68  | 3,7E-02 | <i>Otulinl</i>   | -1,52  | 4,0E-02 |
| <i>Tnfaip8l2</i>     | -1,86  | 2,8E-03 | <i>Nuf2</i>     | -1,68  | 3,9E-03 | <i>Rassf6</i>    | -1,52  | 4,7E-02 |
| <i>Cd83</i>          | -1,85  | 1,6E-03 | <i>Arhgap25</i> | -1,67  | 6,5E-03 | <i>BE692007</i>  | -1,51  | 4,3E-02 |
| <i>Casp1</i>         | -1,85  | 1,0E-02 | <i>Dpep2</i>    | -1,67  | 1,1E-02 | <i>Ilgam</i>     | -1,51  | 1,3E-02 |
| <i>I830077J02Rik</i> | -1,85  | 1,4E-02 | <i>Tlr1</i>     | -1,66  | 4,5E-03 | <i>Ncf2</i>      | -1,50  | 1,3E-02 |
| <i>Bin2</i>          | -1,84  | 3,3E-02 | <i>Rasgef1b</i> | -1,66  | 1,2E-02 | <i>Fgr</i>       | -1,50  | 4,1E-02 |
| <i>Coro1a</i>        | -1,84  | 8,8E-03 | <i>C3ar1</i>    | -1,66  | 7,5E-04 | <i>Il2rg</i>     | -1,50  | 3,8E-03 |
| <i>Naip2</i>         | -1,84  | 1,8E-02 | <i>Dok3</i>     | -1,65  | 1,9E-03 | <i>Tmem273</i>   | -1,50  | 8,8E-03 |
| <i>Was</i>           | -1,84  | 1,2E-02 | <i>Rinl</i>     | -1,65  | 4,2E-03 | <i>Esco2</i>     | -1,48  | 3,0E-02 |
| <i>Stab1</i>         | -1,83  | 6,8E-03 | <i>Pld4</i>     | -1,65  | 3,2E-03 | <i>Tmem106a</i>  | -1,47  | 3,8E-03 |
| <i>Hk3</i>           | -1,83  | 1,3E-02 | <i>Cxcl16</i>   | -1,64  | 1,7E-03 | <i>Lcp2</i>      | -1,47  | 3,5E-02 |
| <i>Ctss</i>          | -1,83  | 5,7E-04 | <i>Alox5ap</i>  | -1,63  | 2,1E-02 | <i>Kif18b</i>    | -1,44  | 2,4E-02 |
| <i>Ccdc88b</i>       | -1,82  | 4,4E-02 | <i>Evi2b</i>    | -1,63  | 4,2E-02 | <i>Ptpn6</i>     | -1,42  | 1,7E-03 |
| <i>Myo1f</i>         | -1,82  | 8,7E-04 | <i>Ccl9</i>     | -1,63  | 3,0E-02 | <i>Clec4d</i>    | -1,40  | 1,4E-02 |
| <i>Fcgr1</i>         | -1,82  | 2,4E-02 | <i>Aif1</i>     | -1,63  | 8,8E-03 | <i>Sla</i>       | -1,39  | 8,7E-03 |
| <i>Lcp1</i>          | -1,80  | 1,4E-03 | <i>Pirb</i>     | -1,63  | 5,0E-03 | <i>Ccl6</i>      | -1,38  | 5,5E-03 |
| <i>Gpr31c</i>        | -1,80  | 1,3E-02 | <i>Shtm1</i>    | -1,63  | 9,4E-03 | <i>Adam8</i>     | -1,38  | 2,2E-04 |
| <i>Styx11</i>        | -1,78  | 3,6E-02 | <i>Al662270</i> | -1,62  | 1,8E-02 | <i>Fgl2</i>      | -1,37  | 2,1E-02 |
| <i>Ikzf1</i>         | -1,78  | 1,1E-02 | <i>Arhgap30</i> | -1,62  | 6,6E-03 | <i>Lgals3bp</i>  | -1,36  | 7,7E-03 |
| <i>Sirpb1c</i>       | -1,78  | 2,2E-02 | <i>Ltc4s</i>    | -1,62  | 4,4E-02 | <i>Cenpa</i>     | -1,36  | 1,4E-02 |
| <i>Trem2</i>         | -1,77  | 7,5E-04 | <i>Arhgap45</i> | -1,62  | 4,6E-04 | <i>Cd180</i>     | -1,36  | 2,9E-02 |
| <i>P2ry6</i>         | -1,76  | 2,6E-03 | <i>Cd200r4</i>  | -1,61  | 7,9E-03 | <i>Hmgb2</i>     | -1,34  | 1,1E-02 |
| <i>Marchf1</i>       | -1,75  | 2,1E-02 | <i>Hck</i>      | -1,60  | 5,0E-04 | <i>Mmp13</i>     | -1,34  | 2,9E-02 |
| <i>Plxnc1</i>        | -1,75  | 1,7E-03 | <i>Tgfb1</i>    | -1,60  | 3,4E-03 | <i>Fut1</i>      | -1,34  | 4,9E-02 |
| <i>H2-DMb1</i>       | -1,75  | 2,6E-02 | <i>Angptl7</i>  | -1,59  | 1,1E-02 | <i>Icosl</i>     | -1,33  | 3,4E-02 |
| <i>Entpd1</i>        | -1,75  | 2,3E-03 | <i>Dock10</i>   | -1,59  | 2,0E-03 | <i>Arhgap4</i>   | -1,32  | 4,7E-02 |
| <i>Ms4a7</i>         | -1,74  | 1,7E-03 | <i>Cd48</i>     | -1,59  | 3,6E-02 | <i>Cd93</i>      | -1,31  | 2,9E-04 |
| <i>Snx20</i>         | -1,74  | 1,1E-02 | <i>Nefl</i>     | -1,58  | 3,0E-04 | <i>Cxcl14</i>    | -1,30  | 2,4E-02 |
| <i>Cd84</i>          | -1,74  | 8,2E-04 | <i>Neurl3</i>   | -1,57  | 8,7E-04 | <i>Cfp</i>       | -1,28  | 8,1E-03 |
| <i>B3gnt8</i>        | -1,73  | 1,9E-02 | <i>Laptm5</i>   | -1,57  | 5,9E-04 | <i>Mki67</i>     | -1,27  | 2,1E-02 |
| <i>Arl11</i>         | -1,73  | 7,7E-03 | <i>Tlr7</i>     | -1,57  | 8,9E-03 | <i>Fbxo5</i>     | -1,26  | 2,1E-02 |
| <i>Gngt2</i>         | -1,73  | 5,6E-03 | <i>Sash3</i>    | -1,57  | 2,8E-02 | <i>Ndc80</i>     | -1,26  | 2,5E-02 |
| <i>Gpr162</i>        | -1,72  | 1,3E-02 | <i>Cyth4</i>    | -1,56  | 5,7E-04 | <i>AB124611</i>  | -1,20  | 4,2E-02 |
| <i>Fcgr3</i>         | -1,72  | 2,2E-04 | <i>Nrros</i>    | -1,56  | 8,8E-03 | <i>Elmo1</i>     | -1,19  | 2,7E-02 |
| <i>Fcer1g</i>        | -1,72  | 1,8E-03 | <i>Ccl3</i>     | -1,56  | 2,6E-02 | <i>Cd14</i>      | -1,19  | 2,1E-02 |
| <i>Pik3ap1</i>       | -1,72  | 1,4E-02 | <i>Gm14548</i>  | -1,55  | 1,8E-02 | <i>Top2a</i>     | -1,18  | 1,1E-02 |
| <i>Il16</i>          | -1,71  | 2,7E-03 | <i>Mybl2</i>    | -1,55  | 2,5E-02 | <i>Apobr</i>     | -1,16  | 3,7E-03 |
| <i>Tbxas1</i>        | -1,71  | 1,7E-02 | <i>Rasal3</i>   | -1,55  | 3,0E-02 | <i>Lpcat2</i>    | -1,16  | 2,2E-02 |
| <i>Mpeg1</i>         | -1,71  | 1,4E-03 | <i>Plek</i>     | -1,55  | 4,6E-04 | <i>Tnfsf13os</i> | -1,16  | 3,2E-02 |
| <i>Itgb2</i>         | -1,70  | 2,6E-03 | <i>Hrh1</i>     | -1,54  | 4,4E-02 | <i>Mtfr2</i>     | -1,16  | 3,0E-02 |
| <i>Wfdc17</i>        | -1,70  | 1,5E-02 | <i>Lat2</i>     | -1,53  | 1,7E-02 | <i>Cep55</i>     | -1,15  | 2,1E-02 |
| <i>Ptpn7</i>         | -1,70  | 1,7E-03 | <i>Adgre1</i>   | -1,53  | 2,7E-02 | <i>Ctla2b</i>    | -1,13  | 2,7E-02 |
| <i>Nlrc4</i>         | -1,69  | 3,1E-02 | <i>Hven1</i>    | -1,53  | 5,2E-03 | <i>Duxbl1</i>    | -1,13  | 2,2E-02 |
| <i>Clec5a</i>        | -1,69  | 1,1E-02 | <i>Illrn</i>    | -1,52  | 3,4E-02 | <i>Cd300a</i>    | -1,11  | 2,5E-02 |

| Gene name            | log2FC | FDR.BH  | Gene name            | log2FC | FDR.BH  | Gene name      | log2FC | FDR.BH  |
|----------------------|--------|---------|----------------------|--------|---------|----------------|--------|---------|
| <i>Syk</i>           | -1,10  | 4,3E-04 | <i>Mylk</i>          | -0,66  | 1,7E-02 | <i>Coro1c</i>  | -0,43  | 1,1E-03 |
| <i>Adap1</i>         | -1,10  | 1,5E-02 | <i>Rgs10</i>         | -0,65  | 1,2E-02 | <i>Dynap</i>   | -0,42  | 2,7E-02 |
| <i>Slamf9</i>        | -1,10  | 1,6E-02 | <i>Dhrs3</i>         | -0,65  | 1,4E-03 | <i>Arl6ip1</i> | -0,41  | 1,6E-02 |
| <i>Gda</i>           | -1,09  | 2,0E-03 | <i>Pla2g7</i>        | -0,64  | 1,3E-02 | <i>Rhobtb1</i> | -0,41  | 2,1E-02 |
| <i>Irf5</i>          | -1,09  | 1,5E-02 | <i>Clrn1</i>         | -0,64  | 2,4E-02 | <i>Ftl1</i>    | -0,41  | 4,4E-02 |
| <i>Rnasel</i>        | -1,08  | 3,4E-03 | <i>Rab32</i>         | -0,63  | 4,4E-02 | <i>Kctd12</i>  | -0,41  | 1,3E-02 |
| <i>Anpep</i>         | -1,06  | 2,5E-02 | <i>Lpl</i>           | -0,63  | 3,5E-03 | <i>Rpa2</i>    | -0,41  | 1,3E-02 |
| <i>Fli1</i>          | -1,06  | 3,8E-03 | <i>Igfbp4</i>        | -0,62  | 3,4E-02 | <i>Arpc1b</i>  | -0,41  | 2,4E-02 |
| <i>Nusap1</i>        | -1,06  | 5,0E-02 | <i>Cyp1b1</i>        | -0,62  | 2,6E-02 | <i>Cnn2</i>    | -0,40  | 1,6E-02 |
| <i>3010003L21Rik</i> | -1,05  | 4,3E-02 | <i>4933421O10Rik</i> | -0,61  | 2,7E-02 | <i>Casp6</i>   | -0,40  | 2,6E-02 |
| <i>Lfng</i>          | -1,02  | 2,2E-02 | <i>Arhgdib</i>       | -0,61  | 6,2E-03 | <i>Sri</i>     | -0,40  | 2,6E-02 |
| <i>Kif22</i>         | -1,01  | 4,9E-02 | <i>Gzme</i>          | -0,59  | 1,5E-02 | <i>Dock11</i>  | -0,40  | 2,4E-02 |
| <i>Sirpa</i>         | -1,00  | 2,6E-06 | <i>Tcp1111</i>       | -0,59  | 2,7E-02 | <i>Anxa8</i>   | -0,39  | 2,0E-02 |
| <i>Mrc1</i>          | -1,00  | 3,2E-02 | <i>Rab7b</i>         | -0,58  | 3,0E-02 | <i>Arl4c</i>   | -0,39  | 4,5E-02 |
| <i>H2-DMa</i>        | -0,99  | 1,6E-03 | <i>Ctsc</i>          | -0,58  | 5,0E-04 | <i>Pnmt</i>    | -0,39  | 4,5E-02 |
| <i>Pik3r5</i>        | -0,99  | 2,9E-02 | <i>Lipa</i>          | -0,55  | 2,6E-03 | <i>Pgm2</i>    | -0,39  | 1,8E-02 |
| <i>Gpmb</i>          | -0,98  | 1,1E-03 | <i>Gpr137b-ps</i>    | -0,55  | 4,1E-03 | <i>Mymx</i>    | -0,39  | 2,2E-03 |
| <i>Cd28</i>          | -0,94  | 1,4E-03 | <i>Cacna2d2</i>      | -0,53  | 1,5E-02 | <i>Tmsb4x</i>  | -0,38  | 9,1E-03 |
| <i>Nckap11</i>       | -0,93  | 5,6E-03 | <i>Hsd17b11</i>      | -0,53  | 2,4E-02 | <i>Tpd52</i>   | -0,38  | 3,7E-03 |
| <i>Cot11</i>         | -0,92  | 2,2E-04 | <i>P2rx4</i>         | -0,53  | 1,9E-02 | <i>Specc1</i>  | -0,38  | 2,7E-02 |
| <i>Gng2</i>          | -0,92  | 1,7E-02 | <i>Casp8</i>         | -0,52  | 2,5E-02 | <i>Wdr75</i>   | -0,38  | 9,9E-03 |
| <i>Atp6v0d2</i>      | -0,89  | 1,3E-02 | <i>Stmn1</i>         | -0,52  | 1,4E-03 | <i>Ctsh</i>    | -0,37  | 5,0E-02 |
| <i>1700007L15Rik</i> | -0,89  | 2,9E-02 | <i>Gm17455</i>       | -0,52  | 2,0E-02 | <i>Arpc5</i>   | -0,37  | 2,4E-03 |
| <i>Il6ra</i>         | -0,85  | 2,4E-02 | <i>Ptgs1</i>         | -0,51  | 1,0E-02 | <i>Edil3</i>   | -0,37  | 2,1E-03 |
| <i>Fabp5</i>         | -0,85  | 5,7E-04 | <i>Tagln2</i>        | -0,50  | 2,8E-03 | <i>Gpr63</i>   | -0,37  | 3,9E-02 |
| <i>Hps1</i>          | -0,84  | 1,4E-03 | <i>Havcr2</i>        | -0,50  | 4,6E-02 | <i>G6pdx</i>   | -0,37  | 1,7E-02 |
| <i>Slc16a6</i>       | -0,84  | 2,0E-02 | <i>Man2b1</i>        | -0,49  | 1,2E-02 | <i>Wipfl</i>   | -0,36  | 2,4E-02 |
| <i>Glipr1</i>        | -0,84  | 5,8E-03 | <i>Ptprj</i>         | -0,48  | 2,5E-02 | <i>Unc93b1</i> | -0,36  | 3,7E-02 |
| <i>Abcb1b</i>        | -0,83  | 2,9E-02 | <i>Fam20a</i>        | -0,48  | 2,0E-02 | <i>Gusb</i>    | -0,36  | 8,1E-03 |
| <i>Jade2</i>         | -0,83  | 8,1E-03 | <i>Tep1</i>          | -0,47  | 5,6E-03 | <i>Myliip</i>  | -0,36  | 3,7E-02 |
| <i>Evi2a</i>         | -0,80  | 1,6E-02 | <i>Galnt7</i>        | -0,47  | 4,9E-02 | <i>Hgsnat</i>  | -0,35  | 3,7E-02 |
| <i>Kcnk2</i>         | -0,80  | 4,9E-03 | <i>Dab2</i>          | -0,46  | 1,7E-03 | <i>Mafb</i>    | -0,35  | 8,0E-04 |
| <i>Cd53</i>          | -0,79  | 1,4E-03 | <i>Gm2a</i>          | -0,46  | 1,4E-03 | <i>Prkcd</i>   | -0,35  | 7,6E-03 |
| <i>Ugt1a7c</i>       | -0,75  | 3,4E-02 | <i>Dock8</i>         | -0,46  | 1,6E-02 | <i>Swap70</i>  | -0,34  | 4,2E-02 |
| <i>Plcg2</i>         | -0,74  | 6,6E-03 | <i>Emb</i>           | -0,45  | 2,3E-02 | <i>Ocrl</i>    | -0,34  | 2,6E-02 |
| <i>H2-D1</i>         | -0,73  | 3,0E-02 | <i>Tor4a</i>         | -0,45  | 2,4E-02 | <i>Ctsb</i>    | -0,34  | 3,4E-02 |
| <i>Arhgap19</i>      | -0,71  | 7,5E-03 | <i>Hexb</i>          | -0,45  | 1,9E-02 | <i>Slc7a8</i>  | -0,33  | 4,2E-03 |
| <i>Abca1</i>         | -0,70  | 7,3E-03 | <i>Il10rb</i>        | -0,45  | 2,6E-03 | <i>Sema4c</i>  | -0,33  | 9,0E-03 |
| <i>9630028I04Rik</i> | -0,70  | 4,1E-02 | <i>Col10a1</i>       | -0,45  | 4,7E-02 | <i>Sptlc2</i>  | -0,33  | 1,3E-02 |
| <i>Fnip2</i>         | -0,68  | 4,3E-03 | <i>Hmga2</i>         | -0,44  | 9,4E-03 | <i>Cdk4</i>    | -0,33  | 6,0E-04 |
| <i>Figl1</i>         | -0,68  | 2,6E-02 | <i>Kcnn4</i>         | -0,44  | 4,5E-02 | <i>Bri3bp</i>  | -0,32  | 4,3E-02 |
| <i>Vrk1</i>          | -0,67  | 4,4E-02 | <i>B2m</i>           | -0,44  | 2,2E-02 | <i>Tpbp</i>    | -0,32  | 2,2E-02 |
| <i>Dkk2</i>          | -0,67  | 2,9E-04 | <i>Atr</i>           | -0,43  | 2,7E-02 | <i>Actb</i>    | -0,32  | 1,6E-02 |
| <i>Dcx</i>           | -0,66  | 4,6E-04 | <i>Poglut3</i>       | -0,43  | 2,4E-02 | <i>Ptk2b</i>   | -0,31  | 1,6E-02 |
| <i>Aqp1</i>          | -0,66  | 3,6E-02 | <i>Srsf3</i>         | -0,43  | 7,5E-04 | <i>Utp20</i>   | -0,31  | 3,0E-02 |

| Gene name      | log2FC | FDR.BH  | Gene name      | log2FC | FDR.BH  | Gene name            | log2FC | FDR.BH  |
|----------------|--------|---------|----------------|--------|---------|----------------------|--------|---------|
| <i>Pip4k2a</i> | -0,31  | 1,7E-02 | <i>Mta2</i>    | -0,15  | 3,0E-02 | <i>Atg9a</i>         | 0,25   | 2,1E-02 |
| <i>Dtx4</i>    | -0,30  | 2,6E-02 | <i>Dnm2</i>    | 0,12   | 4,3E-02 | <i>Arhgap44</i>      | 0,25   | 2,4E-02 |
| <i>Nt5m</i>    | -0,30  | 3,0E-02 | <i>Larp1</i>   | 0,12   | 4,9E-02 | <i>Hrc</i>           | 0,25   | 3,6E-02 |
| <i>Manf</i>    | -0,30  | 2,7E-02 | <i>Cs</i>      | 0,14   | 2,2E-02 | <i>Ciao2b</i>        | 0,25   | 2,4E-02 |
| <i>Anxa1</i>   | -0,29  | 5,7E-03 | <i>Carhsp1</i> | 0,14   | 2,7E-02 | <i>Hs6st1</i>        | 0,26   | 4,9E-03 |
| <i>Iqgap1</i>  | -0,29  | 2,7E-02 | <i>Mdh2</i>    | 0,15   | 3,0E-02 | <i>Fut11</i>         | 0,26   | 4,2E-02 |
| <i>Mgp</i>     | -0,29  | 4,9E-02 | <i>Fxr2</i>    | 0,16   | 4,1E-02 | <i>Cycl</i>          | 0,26   | 3,7E-02 |
| <i>Sgpl1</i>   | -0,29  | 8,2E-03 | <i>Npepps</i>  | 0,16   | 1,6E-02 | <i>Sema3d</i>        | 0,26   | 3,9E-02 |
| <i>Zfp36l2</i> | -0,29  | 4,1E-02 | <i>Inpp1</i>   | 0,17   | 2,7E-02 | <i>Glce</i>          | 0,26   | 4,9E-02 |
| <i>Rab8b</i>   | -0,28  | 1,6E-02 | <i>Atmin</i>   | 0,18   | 4,3E-02 | <i>Rai2</i>          | 0,27   | 1,1E-02 |
| <i>Itga6</i>   | -0,28  | 9,0E-03 | <i>Emc1</i>    | 0,18   | 5,0E-02 | <i>Stbd1</i>         | 0,27   | 1,4E-02 |
| <i>Actg1</i>   | -0,28  | 4,9E-02 | <i>Adgre5</i>  | 0,18   | 3,4E-02 | <i>Mmp15</i>         | 0,27   | 8,8E-03 |
| <i>Rap2a</i>   | -0,28  | 2,4E-02 | <i>Aco2</i>    | 0,18   | 2,1E-02 | <i>Zfp365</i>        | 0,28   | 1,4E-02 |
| <i>Cers2</i>   | -0,28  | 4,2E-02 | <i>Stip1</i>   | 0,18   | 2,5E-02 | <i>Atn1</i>          | 0,28   | 2,5E-02 |
| <i>Cndp2</i>   | -0,28  | 3,4E-02 | <i>Ssbp3</i>   | 0,19   | 2,2E-02 | <i>Slc38a2</i>       | 0,28   | 7,5E-04 |
| <i>Hmgcr</i>   | -0,28  | 1,9E-02 | <i>Prcc</i>    | 0,20   | 2,4E-02 | <i>Iba57</i>         | 0,28   | 4,9E-02 |
| <i>Txn1</i>    | -0,28  | 1,6E-02 | <i>Ube2j2</i>  | 0,20   | 3,9E-02 | <i>Fgfbp1</i>        | 0,28   | 3,1E-02 |
| <i>Shc4</i>    | -0,27  | 3,7E-02 | <i>Aldoa</i>   | -0,73  | 6,5E-01 | <i>Foxo6</i>         | 0,29   | 2,0E-02 |
| <i>Vwa5a</i>   | -0,27  | 1,1E-02 | <i>Zswim8</i>  | 0,21   | 3,5E-02 | <i>Trim3</i>         | 0,29   | 8,9E-03 |
| <i>Hexa</i>    | -0,27  | 7,3E-03 | <i>Irf2bp1</i> | 0,21   | 2,5E-02 | <i>Gpatch8</i>       | 0,29   | 3,9E-02 |
| <i>Grn</i>     | -0,27  | 1,3E-02 | <i>Ppm1b</i>   | 0,21   | 6,1E-03 | <i>Pnmal2</i>        | 0,29   | 2,2E-03 |
| <i>Abhd12</i>  | -0,27  | 1,4E-02 | <i>Ankrd40</i> | 0,21   | 4,8E-02 | <i>Adamts14</i>      | 0,29   | 3,9E-02 |
| <i>Psap</i>    | -0,27  | 7,3E-03 | <i>Fam53a</i>  | 0,21   | 3,2E-02 | <i>Psg28</i>         | 0,29   | 3,3E-03 |
| <i>Gnpdal</i>  | -0,26  | 3,3E-02 | <i>Kcmf1</i>   | 0,21   | 2,4E-02 | <i>Mtres1</i>        | 0,30   | 2,1E-03 |
| <i>Lasp1</i>   | -0,26  | 3,8E-02 | <i>Opa3</i>    | 0,21   | 1,4E-02 | <i>Fhl1</i>          | 0,30   | 3,4E-02 |
| <i>Cfl1</i>    | -0,26  | 2,9E-02 | <i>Rnf126</i>  | 0,21   | 2,4E-02 | <i>Sall2</i>         | 0,31   | 4,9E-02 |
| <i>Elmsan1</i> | -0,26  | 8,5E-03 | <i>Ints9</i>   | 0,22   | 1,6E-02 | <i>Nfic</i>          | 0,31   | 1,1E-02 |
| <i>Rai14</i>   | -0,25  | 1,7E-02 | <i>Lrrc20</i>  | 0,22   | 1,6E-02 | <i>Sema6c</i>        | 0,31   | 4,2E-02 |
| <i>Tmod3</i>   | -0,25  | 1,8E-02 | <i>Mtss2</i>   | 0,22   | 3,5E-02 | <i>Hspa2</i>         | 0,31   | 1,7E-02 |
| <i>Hnrnpa1</i> | -0,25  | 2,1E-03 | <i>Ssx2ip</i>  | 0,22   | 9,0E-03 | <i>6430548M08Rik</i> | 0,32   | 2,2E-03 |
| <i>Marcks</i>  | -0,25  | 2,6E-03 | <i>L3mbtl3</i> | 0,22   | 3,7E-02 | <i>Mafa</i>          | 0,34   | 8,3E-03 |
| <i>Ralb</i>    | -0,25  | 3,9E-02 | <i>Stom</i>    | 0,22   | 1,7E-02 | <i>Traf3ip3</i>      | 0,34   | 3,2E-02 |
| <i>Gadd45a</i> | -0,24  | 1,3E-02 | <i>Dcaf6</i>   | 0,23   | 2,8E-02 | <i>Fbxl16</i>        | 0,34   | 8,1E-03 |
| <i>Rap2b</i>   | -0,24  | 1,6E-02 | <i>Pik3c2b</i> | 0,23   | 3,2E-02 | <i>Hivep1</i>        | 0,35   | 2,2E-02 |
| <i>Snx2</i>    | -0,24  | 3,8E-02 | <i>Coq9</i>    | 0,23   | 2,6E-02 | <i>Cstf2</i>         | 0,36   | 2,1E-03 |
| <i>Serp1</i>   | -0,23  | 3,7E-02 | <i>Map1b</i>   | 0,23   | 3,9E-02 | <i>Fgf11</i>         | 0,36   | 2,0E-03 |
| <i>Lgmn</i>    | -0,23  | 3,7E-02 | <i>Tbx15</i>   | 0,23   | 2,1E-02 | <i>Epb4113</i>       | 0,37   | 2,6E-02 |
| <i>Dnajc3</i>  | -0,21  | 3,8E-02 | <i>Usp31</i>   | 0,24   | 2,9E-02 | <i>E2f2</i>          | 0,38   | 4,5E-03 |
| <i>Calm2</i>   | -0,21  | 3,8E-02 | <i>Tipal</i>   | 0,24   | 4,6E-02 | <i>Satb1</i>         | 0,38   | 1,5E-02 |
| <i>Gnai3</i>   | -0,21  | 4,0E-02 | <i>Cc2d1a</i>  | 0,24   | 1,6E-02 | <i>Oub2</i>          | 0,38   | 6,1E-03 |
| <i>Odc1</i>    | -0,21  | 1,1E-02 | <i>Lrrn1</i>   | 0,24   | 8,8E-03 | <i>Efna2</i>         | 0,39   | 4,7E-02 |
| <i>Actr2</i>   | -0,19  | 3,0E-02 | <i>Agap3</i>   | 0,24   | 1,6E-03 | <i>Ckmt2</i>         | 0,41   | 2,0E-02 |
| <i>Man1c1</i>  | -0,18  | 3,8E-02 | <i>Gab1</i>    | 0,24   | 2,8E-02 | <i>Ache</i>          | 0,44   | 2,6E-03 |
| <i>Rasa3</i>   | -0,18  | 3,6E-02 | <i>Zfp322a</i> | 0,25   | 5,0E-02 | <i>Per1</i>          | 0,47   | 3,0E-02 |
| <i>Eif4a1</i>  | -0,18  | 2,4E-02 | <i>Ubalcl</i>  | 0,25   | 2,9E-02 | <i>Nfatc2</i>        | 0,51   | 1,6E-03 |

| <b>Gene name</b>     | <b>log2FC</b> | <b>FDR.BH</b> |
|----------------------|---------------|---------------|
| <i>Zscan2</i>        | 0,60          | 1,1E-02       |
| <i>1700013G24Rik</i> | 0,60          | 3,1E-02       |
| <i>Ankrd34a</i>      | 0,60          | 3,2E-02       |
| <i>Kcna7</i>         | 0,64          | 1,7E-03       |
| <i>Gm49540</i>       | 0,70          | 3,1E-02       |
| <i>Rgs4</i>          | 0,71          | 3,4E-02       |
| <i>Stc1</i>          | 0,80          | 3,1E-02       |
| <i>Gngt1</i>         | 0,84          | 3,5E-02       |
| <i>Gm50064</i>       | 0,87          | 4,1E-02       |
| <i>Myh13</i>         | 1,01          | 3,8E-02       |
| <i>Xlr3b</i>         | 1,44          | 1,5E-02       |
| <i>Fam131c</i>       | 1,47          | 1,6E-02       |
| <i>Gm16675</i>       | 1,77          | 2,6E-02       |
| <i>Gm20554</i>       | 1,84          | 3,5E-02       |
| <i>A230056P14Rik</i> | 1,89          | 4,2E-02       |
| <i>Gria4</i>         | 2,37          | 3,8E-03       |
| <i>Zdhc23</i>        | 2,40          | 1,1E-02       |
| <i>Sowaha</i>        | 2,46          | 1,9E-02       |
| <i>Rnf43</i>         | 2,57          | 1,7E-02       |
| <i>Atp7b</i>         | 2,79          | 3,7E-02       |

**Supplemental table 2: GSEA positively enriched pathways by NabOHb treatment in primary myocytes.**

| <b>NAME</b>                                               | <b>NES</b> | <b>FDR q-val</b> |
|-----------------------------------------------------------|------------|------------------|
| MMU00020.CITRATE.CYCLE..TCA.CYCLE..KEGG                   | 2.35       | 0.000            |
| MMU04710.CIRCADIAN.RHYTHM.KEGG                            | 2.08       | 0.002            |
| MMU01200.CARBON.METABOLISM.KEGG                           | 1.92       | 0.012            |
| MMU00190.OXIDATIVE.PHOSPHORYLATION.KEGG                   | 1.91       | 0.010            |
| MMU04260.CARDIAC.MUSCLE.CONTRACTION.KEGG                  | 1.91       | 0.009            |
| MMU01210.2.OXOCARBOXYLIC.ACID.METABOLISM.KEGG             | 1.88       | 0.010            |
| MMU04714.THERMOGENESIS.KEGG                               | 1.84       | 0.015            |
| MMU01230.BIOSYNTHESIS.OF.AMINO.ACIDS.KEGG                 | 1.82       | 0.015            |
| MMU00270.CYSTEINE.AND.METHIONINE.METABOLISM.KEGG          | 1.81       | 0.016            |
| MMU03015.MRNA.SURVEILLANCE.PATHWAY.KEGG                   | 1.77       | 0.020            |
| MMU00051.FRUCTOSE.AND.MANNOSE.METABOLISM.KEGG             | 1.74       | 0.023            |
| MMU04152.AMPK.SIGNALING.PATHWAY.KEGG                      | 1.73       | 0.022            |
| MMU05012.PARKINSON.DISEASE.KEGG                           | 1.71       | 0.025            |
| MMU04922.GLUCAGON.SIGNALING.PATHWAY.KEGG                  | 1.68       | 0.031            |
| MMU00630.GLYOXYLATE.AND.DICARBOXYLATE.METABOLISM.KEGG     | 1.67       | 0.032            |
| MMU04932.NON.ALCOHOLIC.FATTY.LIVER.DISEASE..NAFLD..KEGG   | 1.63       | 0.041            |
| MMU05016.HUNTINGTON.DISEASE.KEGG                          | 1.57       | 0.060            |
| MMU00640.PROPANOATE.METABOLISM.KEGG                       | 1.56       | 0.066            |
| MMU04136.AUTOPHAGY...OTHER.KEGG                           | 1.54       | 0.068            |
| MMU00010.GLYCOLYSIS...GLUCONEOGENESIS.KEGG                | 1.50       | 0.092            |
| MMU05010.ALZHEIMER.DISEASE.KEGG                           | 1.50       | 0.089            |
| MMU00620.PYRUVATE.METABOLISM.KEGG                         | 1.48       | 0.090            |
| MMU04120.UBIQUITIN.MEDIATED.PROTEOLYSIS.KEGG              | 1.48       | 0.089            |
| MMU00534.GLYCOSAMINOGLYCAN.SYNTHESIS.HEPARAN.SULFATE.KEGG | 1.47       | 0.092            |
| MMU04910.INSULIN.SIGNALING.PATHWAY.KEGG                   | 1.45       | 0.096            |

**Supplemental table 3: GSEA negatively enriched pathways by NabOHB treatment in primary myocytes.**

| <b>NAME</b>                                                     | <b>NES</b> | <b>FDR q-val</b> |
|-----------------------------------------------------------------|------------|------------------|
| MMU05150.STAPHYLOCOCCUS.AUREUS.INFECTION.KEGG                   | -2.70      | 0.000            |
| MMU04061.VIRAL.PROTEIN.INTERACTION.WITH. CYTOKINE.RECEPTOR.KEGG | -2.50      | 0.000            |
| MMU04145.PHAGOSOME.KEGG                                         | -2.49      | 0.000            |
| MMU04142.LYSOSOME.KEGG                                          | -2.35      | 0.000            |
| MMU04640.HEMATOPOIETIC.CELL.LINEAGE.KEGG                        | -2.35      | 0.000            |
| MMU05140.LEISHMANIASIS.KEGG                                     | -2.34      | 0.000            |
| MMU05323.RHEUMATOID.ARTHRITIS.KEGG                              | -2.29      | 0.000            |
| MMU04380.OSTEOCLAST.DIFFERENTIATION.KEGG                        | -2.27      | 0.000            |
| MMU05332.GRAFT.VERSUS.HOST.DISEASE.KEGG                         | -2.26      | 0.000            |
| MMU04062.CHEMOKINE.SIGNALING.PATHWAY.KEGG                       | -2.26      | 0.000            |
| MMU05152.TUBERCULOSIS.KEGG                                      | -2.24      | 0.000            |
| MMU04940.TYPE.I.DIABETES.MELLITUS.KEGG                          | -2.23      | 0.000            |
| MMU04514.CELL.ADHESION.MOLECULES..CAMS..KEGG                    | -2.22      | 0.000            |
| MMU04060.CYTOKINE.CYTOKINE.RECEPTOR.INTERACTION.KEGG            | -2.21      | 0.000            |
| MMU00531.GLYCOSAMINOGLYCAN.DEGRADATION.KEGG                     | -2.19      | 0.000            |
| MMU05416.VIRAL.MYOCARDITIS.KEGG                                 | -2.17      | 0.000            |
| MMU04672.INTESTINAL.IMMUNE.NETWORK.FOR.IGA.PRODUCTION.KEGG      | -2.16      | 0.000            |
| MMU05330.ALLOGRAFT.REJECTION.KEGG                               | -2.16      | 0.000            |
| MMU04666.FC.GAMMA.R.MEDIATED.PHAGOCYTOSIS.KEGG                  | -2.15      | 0.000            |
| MMU05133.PERTUSSIS.KEGG                                         | -2.14      | 0.000            |
| MMU04670.LEUKOCYTE.TRANSENDOTHELIAL.MIGRATION.KEGG              | -2.14      | 0.000            |
| MMU05320.AUTOIMMUNE.THYROID.DISEASE.KEGG                        | -2.14      | 0.000            |
| MMU04612.ANTIGEN.PROCESSING.AND.PRESENTATION.KEGG               | -2.10      | 0.000            |
| MMU05322.SYSTEMIC.LUPUS.ERYTHEMATOSUS.KEGG                      | -2.07      | 0.000            |
| MMU05310.ASTHMA.KEGG                                            | -2.02      | 0.000            |
| MMU04650.NATURAL.KILLER.CELL.MEDIATED.CYTOTOXICITY.KEGG         | -1.99      | 0.000            |
| MMU05321.INFLAMMATORY.BOWEL.DISEASE..IBD..KEGG                  | -1.95      | 0.001            |
| MMU04662.B.CELL.RECEPTOR.SIGNALING.PATHWAY.KEGG                 | -1.94      | 0.001            |
| MMU04064.NF.KAPPA.B.SIGNALING.PATHWAY.KEGG                      | 1.92       | 0.001            |
| MMU04611.PLATELET.ACTIVATION.KEGG                               | -1.91      | 0.001            |
| MMU03030.DNA.REPLICATION.KEGG                                   | -1.89      | 0.002            |
| MMU03010.RIBOSOME.KEGG                                          | -1.88      | 0.002            |
| MMU04210.APOPTOSIS.KEGG                                         | -1.87      | 0.002            |
| MMU00100.STEROID.BIOSYNTHESIS.KEGG                              | -1.87      | 0.002            |

|                                                                        |       |       |
|------------------------------------------------------------------------|-------|-------|
| MMU05144.MALARIA.KEGG                                                  | -1.85 | 0.003 |
| MMU04621.NOD.LIKE.RECEPTOR.SIGNALING.PATHWAY.KEGG                      | -1.82 | 0.004 |
| MMU05169.EPSTEIN.BARR.VIRUS.INFECTION.KEGG                             | -1.82 | 0.004 |
| MMU05142.CHAGAS.DISEASE..AMERICAN.TRYPANOSOMIASIS..KEGG                | -1.81 | 0.004 |
| MMU05164.INFLUENZA.A.KEGG                                              | -1.79 | 0.006 |
| MMU00511.OTHER.GLYCAN.DEGRADATION.KEGG                                 | -1.77 | 0.006 |
| MMU05202.TRANSCRIPTIONAL.MISREGULATION.IN.CANCER.KEGG                  | -1.75 | 0.008 |
| MMU05418.FLUID.SHEAR.STRESS.AND.ATHEROSCLEROSIS.KEGG                   | -1.73 | 0.010 |
| MMU00480.GLUTATHIONE.METABOLISM.KEGG                                   | -1.73 | 0.011 |
| MMU00603.GLYCOSPHINGOLIPID.BIOSYNTHESIS.GLOBO.AND.ISOGLOBO.SERIES.KEGG | -1.72 | 0.011 |
| MMU04115.P53.SIGNALING.PATHWAY.KEGG                                    | -1.72 | 0.011 |
| MMU04110.CELL.CYCLE.KEGG                                               | -1.71 | 0.012 |
| MMU05163.HUMAN.CYTOMEGALOVIRUS.INFECTION.KEGG                          | -1.71 | 0.012 |
| MMU04625.C.TYPE.LECTIN.RECEPTOR.SIGNALING.PATHWAY.KEGG                 | -1.70 | 0.013 |
| MMU05170.HUMAN.IMMUNODEFICIENCY.VIRUS.1.INFECTION.KEGG                 | -1.69 | 0.014 |
| MMU05143.AFRICAN.TRYPANOSOMIASIS.KEGG                                  | -1.68 | 0.015 |
| MMU05167.KAPOSI.SARCOMA.ASSOCIATED.HERPESVIRUS.INFECTION.KEGG          | -1.67 | 0.017 |
| MMU05221.ACUTE.MYELOID.LEUKEMIA.KEGG                                   | -1.67 | 0.017 |
| MMU04620.TOLL.LIKE.RECEPTOR.SIGNALING.PATHWAY.KEGG                     | -1.67 | 0.017 |
| MMU04664.FC.EPSILON.RI.SIGNALING.PATHWAY.KEGG                          | -1.67 | 0.017 |
| MMU04971.GASTRIC.ACID.SECRETION.KEGG                                   | -1.66 | 0.018 |
| MMU00600.SPHINGOLIPID.METABOLISM.KEGG                                  | -1.65 | 0.019 |
| MMU04810.REGULATION.OF.ACTIN.CYTOSKELETON.KEGG                         | -1.65 | 0.019 |
| MMU04015.RAP1.SIGNALING.PATHWAY.KEGG                                   | -1.65 | 0.019 |
| MMU05132.SALMONELLA.INFECTION.KEGG                                     | -1.64 | 0.020 |
| MMU03440.HOMOLOGOUS.RECOMBINATION.KEGG                                 | -1.64 | 0.020 |
| MMU05100.BACTERIAL.INVASION.OF.EPITHELIAL.CELLS.KEGG                   | -1.64 | 0.020 |
| MMU00520.AMINO.SUGAR.AND.NUCLEOTIDE.SUGAR.METABOLISM.KEGG              | -1.63 | 0.023 |
| MMU04750.INFLAMMATORY.MEDIATOR.REGULATION.OF.TRP.CHANNELS.KEGG         | -1.62 | 0.023 |
| MMU04924.RENIN.SECRETION.KEGG                                          | -1.61 | 0.025 |
| MMU04610.COMPLEMENT.AND.COAGULATION.CASCADES.KEGG                      | -1.59 | 0.031 |
| MMU03430.MISMATCH.REPAIR.KEGG                                          | -1.56 | 0.040 |
| MMU04740.OLFACTORY.TRANSDUCTION.KEGG                                   | -1.55 | 0.043 |
| MMU04979.CHOLESTEROL.METABOLISM.KEGG                                   | -1.55 | 0.044 |
| MMU00240.PYRIMIDINE.METABOLISM.KEGG                                    | -1.55 | 0.045 |
| MMU04072.PHOSPHOLIPASE.D.SIGNALING.PATHWAY.KEGG                        | -1.54 | 0.048 |



|                                                                    |       |       |
|--------------------------------------------------------------------|-------|-------|
| MMU00980.METABOLISM.OF.XENOBIOTICS.BY.CYTOCHROME.P450.KEGG         | -1.53 | 0.049 |
| MMU05340.PRIMARY.IMMUNODEFICIENCY.KEGG                             | -1.53 | 0.049 |
| MMU04658.TH1.AND.TH2.CELL.DIFFERENTIATION.KEGG                     | -1.53 | 0.050 |
| MMU05145.TOXOPLASMOSIS.KEGG                                        | -1.53 | 0.050 |
| MMU04970.SALIVARY.SECRETION.KEGG                                   | -1.52 | 0.050 |
| MMU05166.HUMAN.T.CELL.LEUKEMIA.VIRUS.1.INFECTION.KEGG              | -1.51 | 0.056 |
| MMU04933.AGE.RAGE.SIGNALING.PATHWAY.IN.DIABETIC.COMPLICATIONS.KEGG | -1.51 | 0.056 |
| MMU04540.GAP.JUNCTION.KEGG                                         | -1.50 | 0.059 |
| MMU00340.HISTIDINE.METABOLISM.KEGG                                 | -1.50 | 0.059 |
| MMU04071.SPHINGOLIPID.SIGNALING.PATHWAY.KEGG                       | -1.50 | 0.058 |
| MMU00533.GLYCOSAMINOGLYCAN.BIOSYNTHESIS..KERATAN.SULFATE.KEGG      | -1.49 | 0.061 |
| MMU04510.FOCAL.ADHESION.KEGG                                       | -1.48 | 0.068 |
| MMU00590.ARACHIDONIC.ACID.METABOLISM.KEGG                          | -1.48 | 0.068 |
| MMU05014.AMYOTROPHIC.LATERAL.SCLEROSIS..ALS..KEGG                  | -1.47 | 0.070 |
| MMU04218.CELLULAR.SENESCENCE.KEGG                                  | -1.47 | 0.071 |
| MMU04914.PROGESTERONE.MEDIATED.OOCYTE.MATURATION.KEGG              | -1.45 | 0.081 |
| MMU05200.PATHWAYS.IN.CANCER.KEGG                                   | -1.45 | 0.081 |
| MMU00513.VARIOUS.TYPES.OF.N.GLYCAN.BIOSYNTHESIS.KEGG               | -1.45 | 0.083 |
| MMU04973.CARBOHYDRATE.DIGESTION.AND.ABSORPTION.KEGG                | -1.44 | 0.085 |
| MMU05146.AMOEBIASIS.KEGG                                           | -1.44 | 0.087 |
| MMU05134.LEGIONELLOSIS.KEGG                                        | -1.44 | 0.086 |
| MMU05135.YERSINIA.INFECTION.KEGG                                   | -1.43 | 0.088 |
| MMU00053.ASCORBATE.AND.ALDARATE.METABOLISM.KEGG                    | -1.43 | 0.089 |
| MMU05032.MORPHINE.ADDICTION.KEGG                                   | -1.43 | 0.091 |
| MMU00514.OTHER.TYPES.OF.O.GLYCAN.BIOSYNTHESIS.KEGG                 | -1.42 | 0.093 |
| MMU04520.ADHERENS.JUNCTION.KEGG                                    | -1.42 | 0.093 |
